# Supplementary material for: Lactate kinetics in ICU patients using a bolus of 13C-labeled lactate
Source: PubMed Central journal article supplement (PMC7011254; doi:10.1186/s13054-020-2753-6), 2020-02-10
Supplement: 13054_2020_2753_MOESM1_ESM.pdf [file 13054_2020_2753_MOESM1_ESM.pdf]

## Non-compartmental analysis (NCA), data analysis

Non-compartmental analysis was performed in accordance with reference text books [1-2]. The only exception was related to the 20 sec infusion time in peripheral vein and sampling in the arterial line. This made us use the time = 30 sec as the presumed time for maximum enrichment in the calculations, to avoid overestimation of the area under the curve (AUC, **Fig S1 a**).

The following parameters were calculated from the enrichment (E, expressed as mol percent excess) versus time plots:

$E_0$  was calculated by back extrapolation of the first 3 measurements of tracer enrichment at time points 2, 4 and 6 min in the log domain. The slope was also calculated. Then  $E_{0.5\text{min}}$  was calculated (**Fig S1 a**) as

$$E_{0.5} = e^{(\ln(E_0) + 0.5 * \text{slope})} \quad (1)$$

The terminal slope ( $\lambda_z$ ) and corresponding intercept were calculated in the log E domain from all measurement time points between 70 and 120 min (**Fig S1 b**).

The calculated last measurement ( $E_{\text{last}}$ ) was calculated by the above parameters as

$$E_{\text{last}} = e^{(\text{intercept} + \lambda_z * t_{\text{last}})} \quad (2)$$

where  $t_{\text{last}}$  is 120 min (**Fig S1 b**).

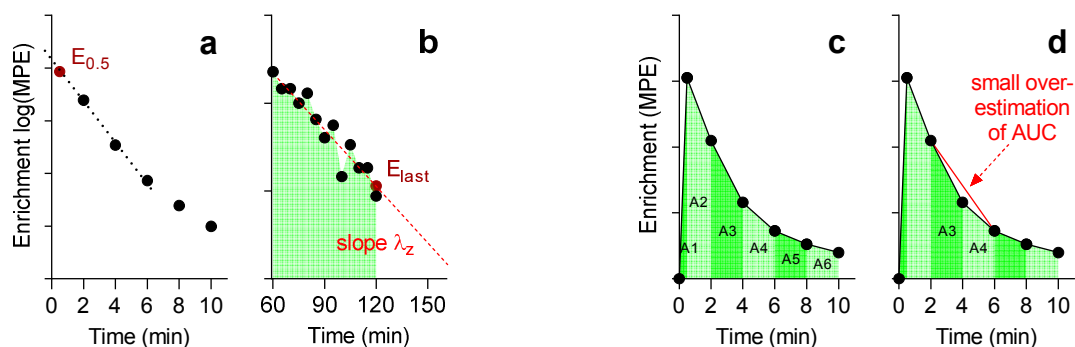

**Fig S1. Illustrations of AUC calculations.** Panel **a** demonstrates back-extrapolation in the log domain to enrichment at 0.5 min ( $E_{0.5}$ ), panel **b** extrapolation beyond the last measurement time point to achieve the calculated last enrichment ( $E_{\text{last}}$ ) and the terminal slope ( $\lambda_z$ ), again in the log domain. Panel **c** is a presentation of the general AUC concept (no logarithms) and panel **d** demonstrates why a missing value at 4 min will cause a small overestimation of AUC if the trapezoidal rule is used. This can however be greatly eliminated by the log-down method.

Area under the curve (AUC) was calculated by the lin-up log-down approach as described in the main paper. The general principle of AUC calculations is presented in **Fig S1 c**, where  $AUC = A_1 + a_2 + A_3 \dots$ . When reducing the number of samples there is an overestimation of AUC as demonstrated by the area between the black and red lines in **Fig S1 d**.

The part of AUC beyond the last measurement ( $AUC_{extrap}$ ) was calculated as

$$AUC_{extrap} = \frac{E_{last}}{\lambda_z} \quad (3)$$

The total area under the curve ( $AUC_{tot}$ ) is then

$$AUC_{tot} = AUC_{last} + AUC_{extrap} \quad (4)$$

and the fraction of AUC after the last measurement point ( $AUC_{extrap\%}$ ) is

$$AUC_{extrap\%} = 100 * \frac{AUC_{extrap}}{AUC_{tot}} \quad (5)$$

Rate of appearance ( $R_a$ ) can be calculated as

$$R_a = \frac{tracer\ dose}{AUC_{tot}} \quad (6)$$

Clearance was calculated as

$$Cl = \frac{R_a * body\ weight}{plasma\ lactate} \quad (7)$$

The moment curve was constructed by multiplying E values by time, and the area under the moment curve (AUCM) was calculated by the same principles as the AUC using a linear up log down approach. The part of AUCM beyond the last measurement point was calculated by

$$AUCM_{extrap} = \frac{E_{last} * t_{last}}{\lambda_z} + \frac{E_{last}}{\lambda_z^2} \quad (8)$$

The total area under the moment curve ( $AUCM_{tot}$ ) is then

$$AUCM_{tot} = AUCM_{0-last} + AUCM_{extrap} \quad (9)$$

Mean residence time (MRT) was calculated by

$$MRT = \frac{AUCM_{tot}}{AUC_{tot}} \quad (10)$$

The distribution volume at steady state ( $V_{ss}$ ) is then

$$V_{ss} = MRT * C \quad (11)$$

The volume of the central compartment ( $V_c$ ) was derived by

$$V_c = \frac{\text{Tracer dose}}{E_{0.5}} \quad (12)$$

## References

1. Pharmacokinetic and Pharmacodynamic Data Analysis: Concepts and Applications, 4th edition, Gabrielsson J and Weiner D, Swedish Pharmaceutical Press, Stockholm, Sweden, 2006
2. Clinical Pharmacokinetics and Pharmacodynamics: Concepts and Applications, 4th edition, Rowland M and Tozer TN, Lippincott Williams and Wilkins, Philadelphia, 2010
