# Supplementary material for: Lactate kinetics in ICU patients using a bolus of 13C-labeled lactate
Source: PubMed Central journal article supplement (PMC7011254; doi:10.1186/s13054-020-2753-6), 2020-02-10

### Additional file 3

Plasma lactate concentrations for healthy volunteers (top, n=6)) and ICU patients (bottom, n=10) after a bolus dose of  $^{13}\text{C}$ -labeled lactate during 20 seconds at  $t=0$ . In one healthy subject the blood gas analyzer was malfunctioning. Plasma lactate for this subject was reanalyzed from the frozen plasma sample according as previously described [25].

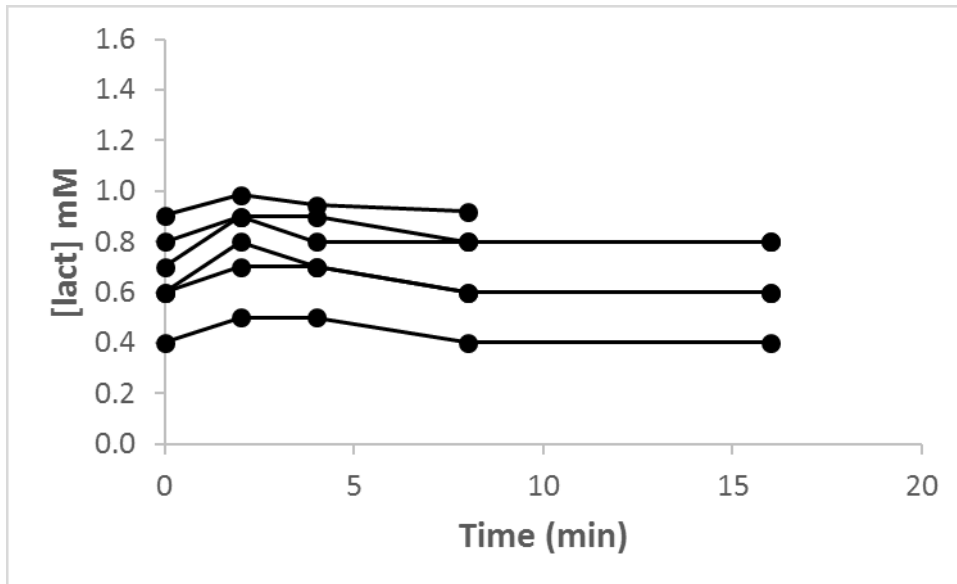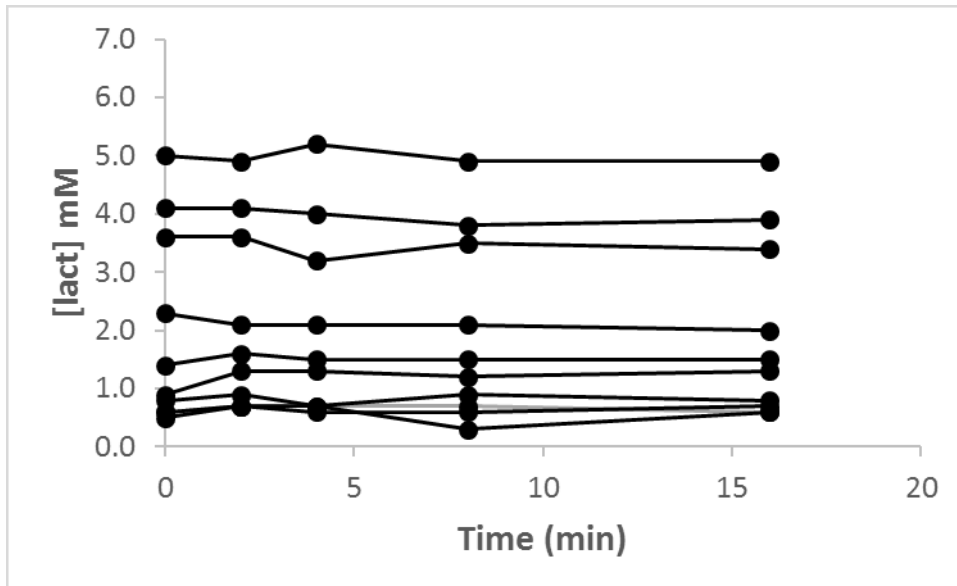

Supplement: 13054_2020_2753_MOESM3_ESM.pdf [file 13054_2020_2753_MOESM3_ESM.pdf]
